# Supplementary material
Source: Springer Nature journal article supplement (https://www.springermedizin.de/resource/supplementary/12889_2014_7444_MOESM1_ESM.pdf/9497392)
Supplement: MOESM1 [file 9497392]

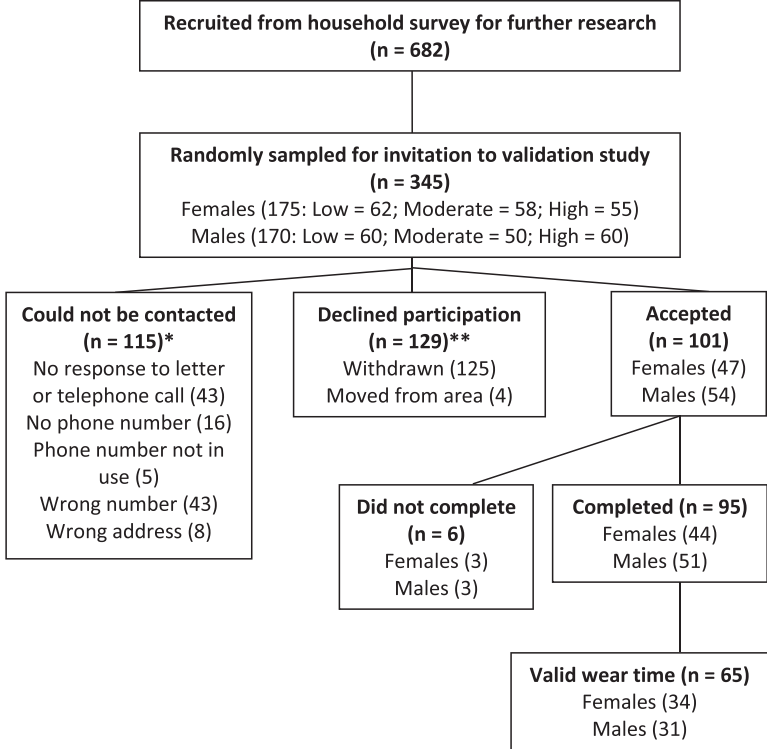

\*Females (49: Low = 13; Moderate = 14; High = 22); Males (66: Low = 19; Moderate = 24; High = 23)

\*\* Females (79: Low = 35; Moderate = 24; High = 10); Males (50: Low = 26; Moderate = 9; High = 15)
